# Supplementary material for: Analyzing the outdoor degradation behavior of organic solar modules in North China
Source: Royal Society of Chemistry journal article supplement (doi:10.1039/d4ta00493k), 2024-01-01
Supplement: d4ta00493k1.pdf [file d4ta00493k1.pdf]

Table s1. Typical indoor OSC lifetime experiments based on ISOS.

| Dark storage lifetime        |                               |                 |             |                                  |      |
|------------------------------|-------------------------------|-----------------|-------------|----------------------------------|------|
| Test protocols               | Active layer                  | Initial PCE (%) | Lifetime    | Size                             | Ref. |
| ISOS-D-1                     | P3HT: PCBM                    | 3.14            | 245 days    | 1.2 × 3.5 cm <sup>2</sup>        | [1]  |
| ISOS-D-3                     | P3HT: PCBM                    | 2.7             | >12000h     | 5 × 5 cm <sup>2</sup>            | [2]  |
| ISOS-D-1                     | PTB7: PC <sub>70</sub> BM     | 7.76            | <300h       | -                                | [3]  |
| ISOS-D-2                     | P3HT: PCBM                    | ≈1.6            | ≈5000h      | 38, 110, and 186 cm <sup>2</sup> | [4]  |
| ISOS-D-2                     | P3HT: PC <sub>70</sub> BM     | 3.16            | ≈160h       | -                                | [5]  |
| ISOS-D-2                     | DPPTT: PC <sub>70</sub> BM    | 2.86            | ≈120h       | 12 mm <sup>2</sup>               | [5]  |
| ISOS-D-1                     | PTB7: P(NDI2OD-T2)            | 7.07            | >72days     | 0.1 cm <sup>2</sup>              | [6]  |
| Constant irradiance lifetime |                               |                 |             |                                  |      |
| Test protocols               | Active layer                  | Initial PCE(%)  | Lifetime(h) | Size                             | Ref. |
| ISOS-L-1                     | DR3TSBDT: PC <sub>70</sub> BM | 9.6             | 5600        | -                                | [7]  |
| ISOS-L-1                     | PCDTBT: PC <sub>70</sub> BM   | 5.5             | >12000      | 0.5 cm <sup>2</sup>              | [8]  |
| ISOS-L-1                     | PCDTBT: PC <sub>70</sub> BM   | 5.5             | ≈18000      | 7.06 mm <sup>2</sup>             | [9]  |
| ISOS-L-2                     | P3HT: PCBM                    | 3.54            | ≈2300       | 0.04 cm <sup>2</sup>             | [10] |
| ISOS-L-1                     | PCDTBT: PC <sub>70</sub> BM   | 5.2             | 14500       | 4 mm <sup>2</sup>                | [11] |
| ISOS-L-1                     | PTB7-Th: PC70BM               | 10.5            | >600        | 0.28 cm <sup>2</sup>             | [12] |
| ISOS-L-1                     | P3HT: PCBM                    | 3.7             | >6500       | -                                | [13] |

Table s2. The standard error of collected data.

| Open circuit samples  |               |                |       |              |           |
|-----------------------|---------------|----------------|-------|--------------|-----------|
| color                 | $I_{sc}$ (mA) | $P_{max}$ (mW) | FF(%) | $V_{oc}$ (V) | PCE(%)    |
|                       | 0             | 0              | 0     | 0            | 0         |
|                       | 0.39          | 1.263          | 2.169 | 0.007        | 1.219E-2  |
|                       | 0.78          | 2.525          | 4.338 | 0.014        | 2.438E-2  |
|                       | 1.17          | 3.788          | 6.506 | 0.021        | 3.656E-2  |
|                       | 1.56          | 5.05           | 8.657 | 0.028        | 4.875E-2  |
|                       | 1.95          | 6.313          | 10.84 | 0.035        | 6.094E-2  |
|                       | 2.34          | 7.575          | 13.01 | 0.042        | 7.312E-2  |
|                       | 2.73          | 8.838          | 15.18 | 0.049        | 8.531E-2  |
|                       | 3.12          | 10.1           | 17.35 | 0.056        | 9.75E-2   |
| Short circuit samples |               |                |       |              |           |
|                       | 0             | 0              | 0     | 0            | 0         |
|                       | 1.043         | 3.95           | 0.525 | 8.325E-3     | 3.725E-2  |
|                       | 2.085         | 7.9            | 1.05  | 1.665E-2     | 7.45E-2   |
|                       | 3.127         | 11.85          | 1.575 | 2.498E-2     | 1.117E-2  |
|                       | 4.17          | 15.8           | 2.1   | 3.33E-2      | 1.49E-2   |
|                       | 5.213         | 19.75          | 2.625 | 4.163E-2     | 1.863E-2  |
|                       | 6.255         | 23.7           | 3.15  | 4.995E-2     | 2.235E-2  |
|                       | 7.297         | 27.65          | 3.675 | 5.828E-2     | 2.6507E-2 |
|                       | 8.34          | 31.6           | 4.2   | 6.66E-2      | 2.98E-2   |

Table s3. The linear fitting parameters of  $I_{sc}$ ,  $P_{max}$  and  $V_{oc}$ .

|           | $I_{sc}$ |         | $P_{max}$ |         | $V_{oc}$ |         |
|-----------|----------|---------|-----------|---------|----------|---------|
|           | Value    | Error   | Value     | Error   | Value    | Error   |
| Slope     | 0.09     | 9.86E-4 | 0.39      | 4.04E-3 | -0.014   | 3.09E-4 |
| Intercept | 1.64     | 0.66    | 8.33      | 2.70    | 7.48     | 6.89E-3 |

Table s4. The non-linear fitting parameters of PCE.

|   | Full data |                | Radiation intensity over 800w/m <sup>2</sup> |                |
|---|-----------|----------------|----------------------------------------------|----------------|
|   | Value     | Standard Error | Value                                        | Standard Error |
| a | 3.25      | 0.026          | 3.25                                         | 0.013          |
| b | 1.34      | 0.076          | 0.88                                         | 0.042          |
| c | 9.13E-04  | 9.79E-05       | 7.30E-04                                     | 6.78E-05       |

Table s5. The linear fitting results.

| Connection of | PCE with temperature |         | PCE with time |         |
|---------------|----------------------|---------|---------------|---------|
|               | Value                | Error   | Value         | Error   |
| Slope         | 1.06E-2              | 6.70E-4 | -6.70E-6      | 2.99E-6 |
| Intercept     | 2.85                 | 1.50E-2 | 3.22          | 4.16E-2 |

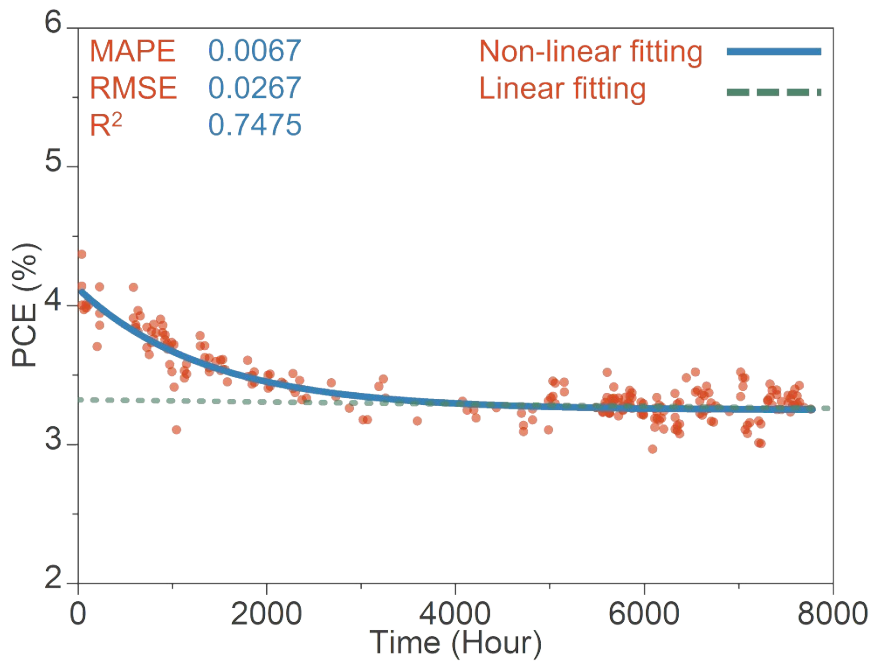

Figure s1 Fitting result of time and PCE (radiation intensity over 800w/m<sup>2</sup>)

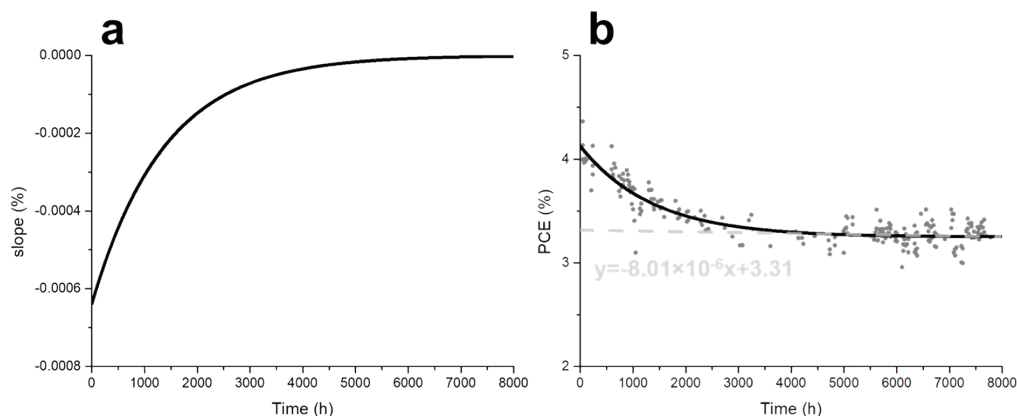

Figure s2 Linear fitting result based on the slope rate.

(a)The slope rate of the non-linear model. (b) the fitting results.

The absolute value of slope rate of the non-linear model decreases with time as shown in Figure s1a and stable at 6000h. We used the slope rate and value at 6000h to set up the linear fitting model and the result was shown as Figure s1b. The extrapolation E0 value was around 3.31% and the decrease ratio was about  $8.01 \times 10^{-6}$  per hour. The T80 was over 9 years ( $\approx 9.43$  years).

[1] Dey, Somnath, et al. "Enhanced performance and stability of inverted organic solar cells by using novel zinc-benzothiazole complexes as anode buffer layers." *Journal of Materials Chemistry* 21.39 (2011): 15587-15592.

[2] Sapkota, Subarna Babu, et al. "Promising long-term stability of encapsulated ITO-free bulk-heterojunction organic solar cells under different aging conditions." *Solar energy materials and solar cells* 130 (2014): 144-150.

[3] Kim, Wanjung, et al. "Conflicted effects of a solvent additive on PTB7: PC71BM bulk heterojunction solar cells." *The Journal of Physical Chemistry C* 119.11 (2015): 5954-5961.

[4] Angmo, Dechan, et al. "Scalability and stability of very thin, roll-to-roll processed, large area, indium-tin-oxide free polymer solar cell modules." *Organic Electronics* 14.3 (2013): 984-994.

[5] Hermerschmidt, Felix, et al. "Influence of the hole transporting layer on the thermal stability of inverted organic photovoltaics using accelerated-heat lifetime protocols." *ACS applied materials & interfaces* 9.16 (2017): 14136-14144.

- [6] Reshma, Liyakath, and Kannappan Santhakumar. "Non-fullerene organic solar cells with 7% efficiency and excellent air stability through morphological and interfacial engineering." *Organic Electronics* 47 (2017): 35-43.
- [7] Cheacharoen, Rongrong, et al. "Assessing the stability of high performance solution processed small molecule solar cells." *Solar Energy Materials and Solar Cells* 161 (2017): 368-376.
- [8] Peters, Craig H., et al. "High efficiency polymer solar cells with long operating lifetimes." *Advanced Energy Materials* 1.4 (2011): 491-494.
- [9] Roesch, Roland, et al. "Polymer solar cells with enhanced lifetime by improved electrode stability and sealing." *Solar energy materials and solar cells* 117 (2013): 59-66.
- [10] Gao, Dong, et al. "C60: LiF blocking layer for environmentally stable bulk heterojunction solar cells." *Advanced Materials* 22.47 (2010): 5404-5408.
- [11] Bovill, E., et al. "The role of the hole-extraction layer in determining the operational stability of a polycarbazole: fullerene bulk-heterojunction photovoltaic device." *Applied Physics Letters* 106.7 (2015): 21\_1.
- [12] Yan, Yu, et al. "Light-Soaking-Free Inverted Polymer Solar Cells with an Efficiency of 10.5% by Compositional and Surface Modifications to a Low-Temperature-Processed TiO<sub>2</sub> Electron-Transport Layer." *Advanced Materials* 29.1 (2017): 1604044.
- [13] Karpinski, Arkadiusz, et al. "Anatase colloidal solutions suitable for inkjet printing: Enhancing lifetime of hybrid organic solar cells." *Solar energy materials and solar cells* 116 (2013): 27-33.
